# Supplementary material for: Clinical trial protocol for PanDox: a phase I study of targeted chemotherapy delivery to non-resectable primary pancreatic tumours using thermosensitive liposomal doxorubicin (ThermoDox®) and focused ultrasound
Source: PubMed Central journal article supplement (PMC10517508; doi:10.1186/s12885-023-11228-z), 2023-09-23
Supplement: 12885_2023_11228_MOESM1_ESM.pdf [file 12885_2023_11228_MOESM1_ESM.pdf]

## Supplementary material 1: schedule of events

| Visit Description                                                                         | Screening | Baseline DCE-MRI                         | Treatment | Post Treatment | Follow Up Visit | End of study  |
|-------------------------------------------------------------------------------------------|-----------|------------------------------------------|-----------|----------------|-----------------|---------------|
| Visit number                                                                              | 1         | 2<br>(Arm B only)                        | 3a        | 3b             | 4               | 5             |
| Assessment window                                                                         | -14 days  | Post-registration but prior to treatment | Day 1     | Day 2          | Day 12 (+/- 2)  | Day 21 (+/-2) |
| <b>Informed Consent</b>                                                                   |           |                                          |           |                |                 |               |
| Informed Consent                                                                          | x         |                                          |           |                |                 |               |
| <b>Inclusion/Exclusion criteria</b>                                                       |           |                                          |           |                |                 |               |
| Inclusion/Exclusion criteria                                                              | x         |                                          |           |                |                 |               |
| <b>Demographics</b>                                                                       |           |                                          |           |                |                 |               |
| Demographics                                                                              | x         |                                          |           |                |                 |               |
| <b>Medical History</b>                                                                    |           |                                          |           |                |                 |               |
| Medical History                                                                           | x         |                                          |           |                |                 |               |
| <b>Concomitant medication</b>                                                             |           |                                          |           |                |                 |               |
| Concomitant medication                                                                    | x         |                                          |           |                | x               | x             |
| <b>ECOG Performance Status</b>                                                            |           |                                          |           |                |                 |               |
| ECOG Performance Status                                                                   | x         |                                          |           |                | x               | x             |
| <b>Physical examination</b>                                                               |           |                                          |           |                |                 |               |
| Physical examination                                                                      | x         |                                          |           | x              | x               | x             |
| <b>Anaesthetic assessment</b>                                                             |           |                                          |           |                |                 |               |
| Anaesthetic assessment                                                                    | x         |                                          |           |                |                 |               |
| <b>FUS Feasibility and Planning with Ultrasound</b>                                       |           |                                          |           |                |                 |               |
| FUS Feasibility and Planning with Ultrasound                                              | x         |                                          |           |                |                 |               |
| <b>Vital signs</b>                                                                        |           |                                          |           |                |                 |               |
| Vital signs                                                                               | x         |                                          | x         | x              |                 |               |
| <b>Height</b>                                                                             |           |                                          |           |                |                 |               |
| Height                                                                                    | x         |                                          |           |                |                 |               |
| <b>Weight</b>                                                                             |           |                                          |           |                |                 |               |
| Weight                                                                                    | x         |                                          |           |                |                 |               |
| <b>Pregnancy Test</b>                                                                     |           |                                          |           |                |                 |               |
| Pregnancy Test                                                                            | x         |                                          |           |                |                 | x             |
| <b>12 lead ECG</b>                                                                        |           |                                          |           |                |                 |               |
| 12 lead ECG                                                                               | x         |                                          |           |                |                 |               |
| <b>ECHO</b>                                                                               |           |                                          |           |                |                 |               |
| ECHO                                                                                      | x         |                                          |           |                |                 |               |
| <b>Blood tests – Group and Save</b>                                                       |           |                                          |           |                |                 |               |
| Blood tests – Group and Save                                                              | x         |                                          |           |                |                 |               |
| <b>Haematology</b>                                                                        |           |                                          |           |                |                 |               |
| Haematology                                                                               | x         |                                          | x         | x              | x               | x             |
| <b>Biochemistry</b>                                                                       |           |                                          |           |                |                 |               |
| Biochemistry                                                                              | x         |                                          | x         | x              | x               | x             |
| <b>Coagulation studies</b>                                                                |           |                                          |           |                |                 |               |
| Coagulation studies                                                                       | x         |                                          |           |                |                 |               |
| <b>Serology Assessments</b>                                                               |           |                                          |           |                |                 |               |
| Serology Assessments                                                                      | x         |                                          |           |                |                 |               |
| <b>Tumour markers</b>                                                                     |           |                                          |           |                |                 |               |
| Tumour markers                                                                            | x         |                                          | x         |                | x               | x             |
| <b>QoL questionnaires – PAN26</b>                                                         |           |                                          |           |                |                 |               |
| QoL questionnaires – PAN26                                                                | x         |                                          | x         | x              | x               | x             |
| <b>Arm Assignment Review</b>                                                              |           |                                          |           |                |                 |               |
| Arm Assignment Review                                                                     | x         |                                          |           |                |                 |               |
| <b>Radiological assessment - CT Chest/Abdo/Pelvis with contrast</b>                       |           |                                          |           |                |                 |               |
| Radiological assessment - CT Chest/Abdo/Pelvis with contrast                              | x         |                                          |           |                |                 |               |
| <b>Radiological assessment - FDG-PET</b>                                                  |           |                                          |           |                |                 |               |
| Radiological assessment - FDG-PET                                                         | x         |                                          |           |                | x               |               |
| <b>Trial Registration</b>                                                                 |           |                                          |           |                |                 |               |
| Trial Registration                                                                        | x         |                                          |           |                |                 |               |
| <b>Radiological assessment of tumour(s) by DCE-MRI - Arm B only</b>                       |           |                                          |           |                |                 |               |
| Radiological assessment of tumour(s) by DCE-MRI - Arm B only                              |           | x                                        |           | x              |                 |               |
| <b>Pre-medication (20mg oral dexamethasone) – Arm B only</b>                              |           |                                          |           |                |                 |               |
| Pre-medication (20mg oral dexamethasone) – Arm B only                                     |           | x (24h prior to FUS)                     |           |                |                 |               |
| <b>Pre-medication (including for anaesthetic, anti-hypersensitivity and anti-emetics)</b> |           |                                          |           |                |                 |               |
| Pre-medication (including for anaesthetic, anti-hypersensitivity and anti-emetics)        |           |                                          | x         |                |                 |               |
| <b>Plasma samples – (T0)</b>                                                              |           |                                          |           |                |                 |               |
| Plasma samples – (T0)                                                                     |           |                                          | x         |                |                 |               |
| <b>Plasma samples (T1)</b>                                                                |           |                                          |           |                |                 |               |
| Plasma samples (T1)                                                                       |           |                                          | x         |                |                 |               |
| <b>Plasma samples (T2)</b>                                                                |           |                                          |           |                |                 |               |
| Plasma samples (T2)                                                                       |           |                                          | x         |                |                 |               |
| <b>Dosing with Doxorubicin/ThermoDox + FUS</b>                                            |           |                                          |           |                |                 |               |
| Dosing with Doxorubicin/ThermoDox + FUS                                                   |           |                                          | x         |                |                 |               |
| <b>Overnight observation - Arm B only</b>                                                 |           |                                          |           |                |                 |               |
| Overnight observation - Arm B only                                                        |           |                                          | x         |                |                 |               |
| <b>Biopsy for tumour samples</b>                                                          |           |                                          |           |                |                 |               |
| Biopsy for tumour samples                                                                 |           |                                          |           | x              |                 |               |
| <b>Adverse event recording</b>                                                            |           |                                          |           |                |                 |               |
| Adverse event recording                                                                   |           |                                          | x         | x              | x               | x             |
| <b>Serious Adverse Event Recording</b>                                                    |           |                                          |           |                |                 |               |
| Serious Adverse Event Recording                                                           | x         | x                                        | x         | x              | x               | x             |
