# Supplementary material for: Clinical trial protocol for PanDox: a phase I study of targeted chemotherapy delivery to non-resectable primary pancreatic tumours using thermosensitive liposomal doxorubicin (ThermoDox®) and focused ultrasound
Source: PubMed Central journal article supplement (PMC10517508; doi:10.1186/s12885-023-11228-z), 2023-09-23
Supplement: 12885_2023_11228_MOESM2_ESM.pdf [file 12885_2023_11228_MOESM2_ESM.pdf]

## Supplementary material 2: Arm Allocation checklist

During screening, all patients are reviewed using the criteria below to assign to treatment group.

If any answer is “No” (shaded box) then the participant will be allocated to Arm A (standard doxorubicin only), otherwise to Arm B (ThermoDox® with FUS).

| Characteristic                                                                                                              | Yes | No |
|-----------------------------------------------------------------------------------------------------------------------------|-----|----|
| <b>Patient</b>                                                                                                              |     |    |
| BMI below 35                                                                                                                |     |    |
| Suitable for GA +/- jet ventilation                                                                                         |     |    |
|                                                                                                                             |     |    |
| <b>Tumour</b>                                                                                                               |     |    |
| Tumour visible on US with patient in prone position                                                                         |     |    |
| Distance from tumour to the stomach , duodenum, colon >1 cm                                                                 |     |    |
|                                                                                                                             |     |    |
| <b>Clinical Reason</b>                                                                                                      |     |    |
| Please confirm that no clinical reasons have been identified that would prevent the patient being assigned Arm B treatment. |     |    |
