# Supplementary material for: Clinical trial protocol for PanDox: a phase I study of targeted chemotherapy delivery to non-resectable primary pancreatic tumours using thermosensitive liposomal doxorubicin (ThermoDox®) and focused ultrasound
Source: PubMed Central journal article supplement (PMC10517508; doi:10.1186/s12885-023-11228-z), 2023-09-23

Supplementary material 3: CONSORT flow diagram

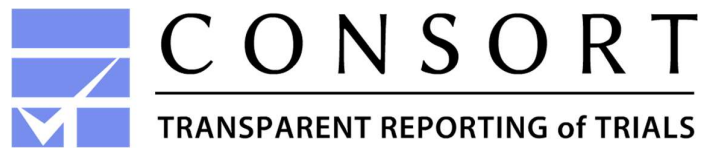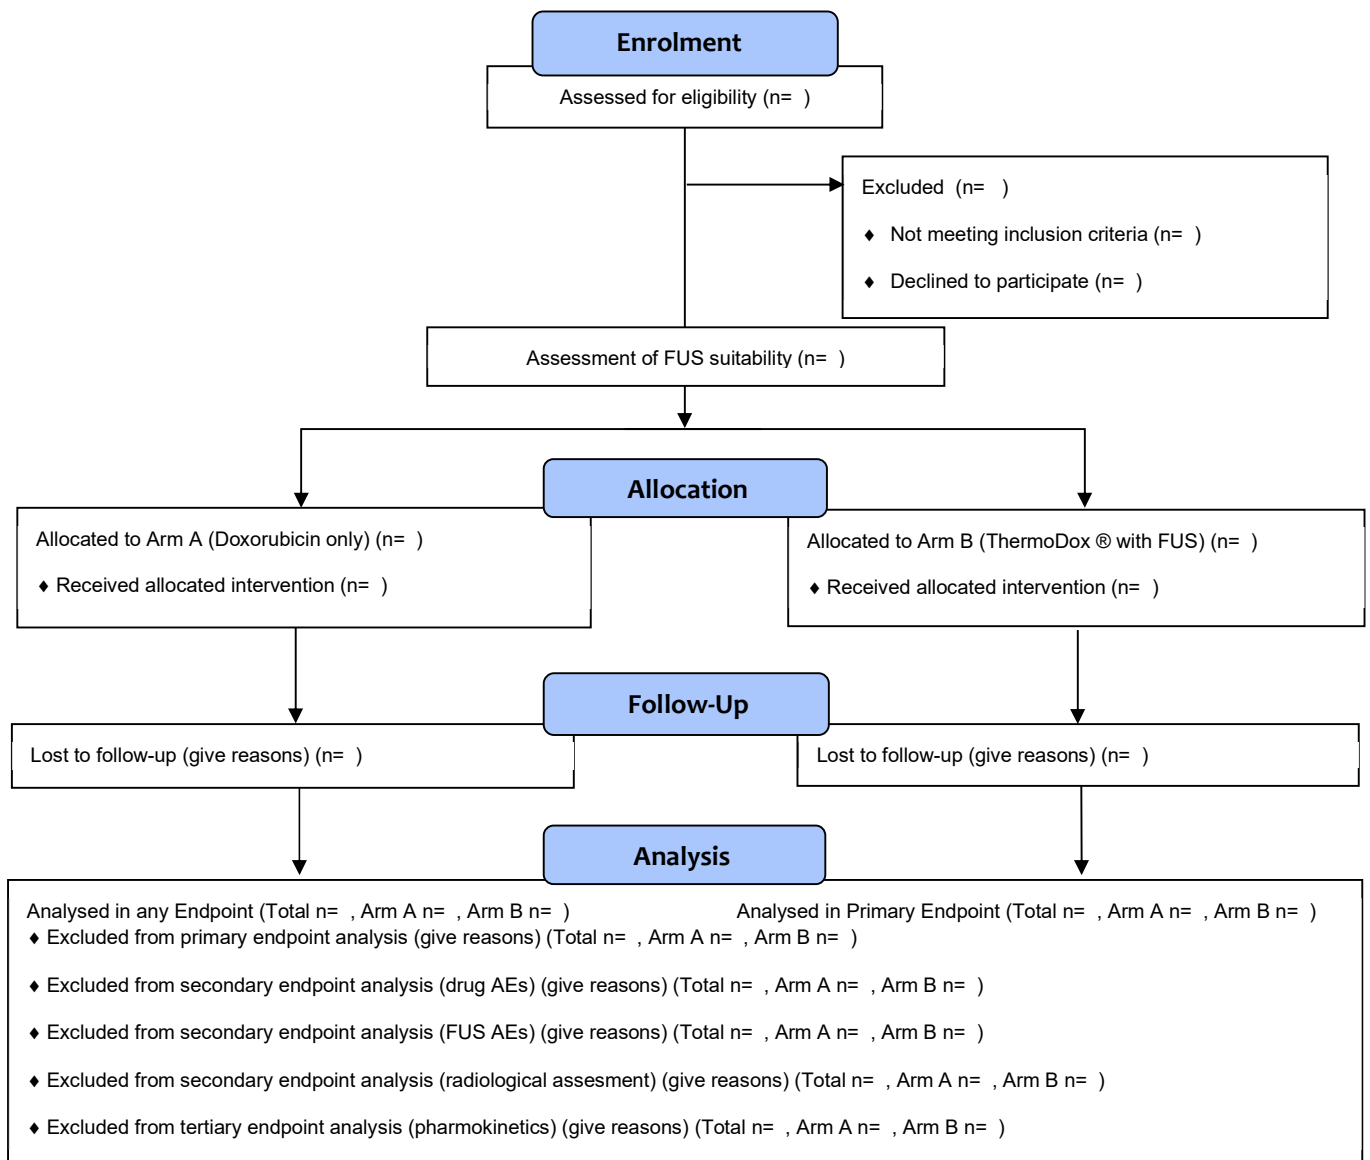

Supplement: 12885_2023_11228_MOESM3_ESM.pdf [file 12885_2023_11228_MOESM3_ESM.pdf]
